# Supplementary material for: The missing link between genetic association and regulatory function
Source: eLife. 2022 Dec 14;11:e74970. doi: 10.7554/eLife.74970 (PMC9842386; doi:10.7554/eLife.74970)
Supplement: Supplementary file 1. — Tissue types from the Roadmap Epigenomics Consortium do not perfectly match those from GTEx. However, there is overlap, and as with GTEx, we analyzed trait-relevant tissues. [file elife-74970-supp1.csv]

Alias	Descriptive Name
E027	Breast myoepithelial primary Cells
E028	Breast luminal epithelial Cells / Human mammary epithelial cells
E062	Primary mononuclear cells from peripheral blood
E063	Adipose nuclei
E066	Liver
E075	Colonic mucosa
E076	Colon smooth muscle
E087	Pancreatic islets
E095	Heart left ventricle
E096	Lung
E104	Heart right atrium
E107	Skeletal Muscle Male
E108	Skeletal Muscle Female
E109	Small Intestine
