# Supplementary material for: The missing link between genetic association and regulatory function
Source: eLife. 2022 Dec 14;11:e74970. doi: 10.7554/eLife.74970 (PMC9842386; doi:10.7554/eLife.74970)
Supplement: Supplementary file 2. — Meuleman et al., 2020 assess DNase I hypersensitive sites across 438 cell and tissue types; we selected the above based on their relevance to our complex traits. [file elife-74970-supp2.csv]

Tissue	Biosample Name
Adipose	AL
Blood	Namalwa_0 Karpas_422 K562 CD34_T0 CD56 GM12878 CD3 NB4 hTH1 CD34_T17 Dendritic_cells_C51 hTH17 CD34_T18 GM12865 CD14 CD34_T15 CD34_T8 hTR iTH2 CD19 iTH1 KBM7 hTH2 Oci_Ly_7 Jurkat Dendritic_cells_C190 CD4 RPMI_8226 fThymus MM_1S CD4pos_N CD34_T6 CD8 CD20 CMK GM06990 CD34_T4 HAP1 GM12864 Namalwa + Sendai virus_2h CD34
Bone	fBone_arm_left fBone_femur fBone_leg_left fBone_arm_right SK_N_MC MG63 fBone_leg_right limb A673 SJSA1
Colon	CACO2 RKO LoVo HCT116 CEC PANC1 SW_480 HT29
Heart	HCF fLeftVentricle fHeartFibroblasts RuES2_cms H7_hESC_T2 H7_hESC_T9 fHeart HPAEC H7_hESC_T14 HCFaa AoAF HCM Heart fRightVentricle H7_hESC_T5 fLeftAtrium
Liver	hepatocytes fLiver HepG2
Lung	fLung_L A549 NHBE_RA WI_38_TAM fLung_R NHLF IMR90 SAEC AG04450 NCI_H460 fLung PC9 HMVEC_LBl WI_38 HPF HMVEC_LLy
Mammary	MCF10a_ER_SRC_6h_Tam/Washout 18 h MCF10a_ER_SRC_control MCF10a_ER_SRC_24h_Tam MCF7 HMEC T_47D MCF7_ER HMF vHMEC
Muscle	SkMC fMuscle_arm fMuscle_lower_limb LHCN_M2 fMuscle_upper_back fMuscle_back LHCN_M2_D4 Psoas_Muscle SJCRH30 fMuscle_upper_limb_sk HSMM_D HSMM fMuscle_trunk fMuscle_leg
Pancreas	Pancreas ISL1
Small Intestine	fIntestine_Sm Small_Intestine_Mucosa
